# Supplementary material for: Potential Antidiabetic Activity of Extracts and Isolated Compound from Adenosma bracteosum (Bonati)
Source: PubMed Central journal article supplement (PMC7072461; doi:10.3390/biom10020201), 2020-01-29

## Supplementary Data

### ISOLATION AND EVALUATION ANTIDIABETIC ACTIVITY OF *Adenosma bracteosum* (Bonati)

#### Legend of Figure

**Figure S1.**  $^1\text{H}$  NMR spectrum of compound IG in  $\text{DMSO-}d_6$  at 500 MHz

**Figure S2.**  $^{13}\text{C}$  NMR spectrum of compound IG in  $\text{DMSO-}d_6$  at 125 MHz

**Figure S3.** HMBC spectrum of compound IG in  $\text{DMSO-}d_6$

**Figure S4.** HSQC spectrum of compound IG in  $\text{DMSO-}d_6$

**Figure S5.** HR-ESI-MS spectrum of compound IG

**Figure S1.**  $^1\text{H}$  NMR spectrum of compound IG in  $\text{DMSO-}d_6$  at 500 MHz

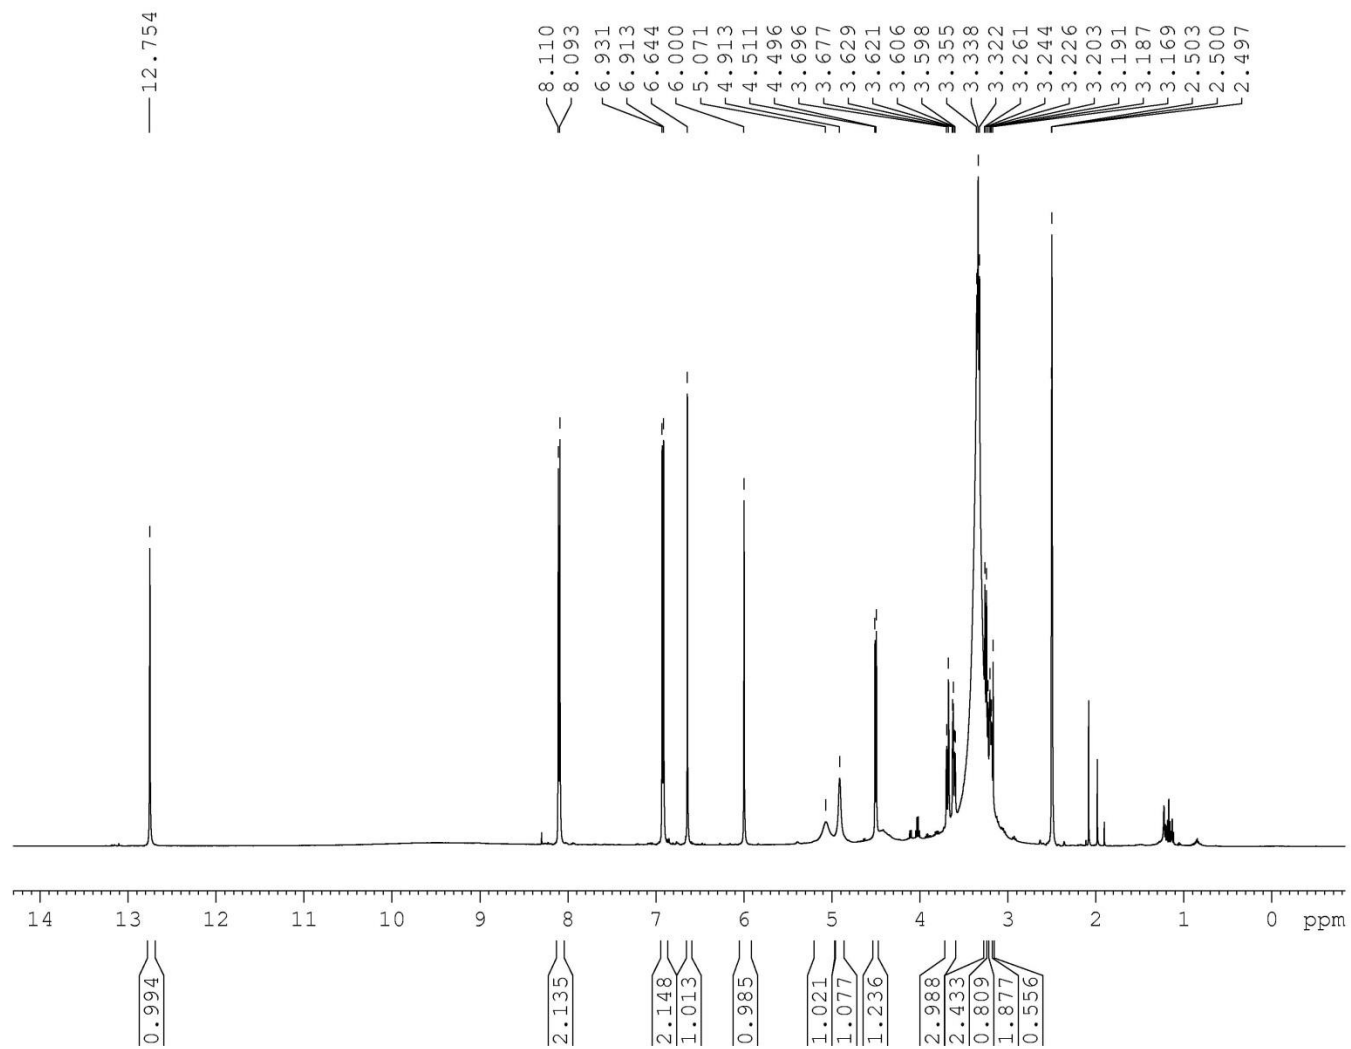

**Figure S2.**  $^{13}\text{C}$  NMR spectrum of compound IG in  $\text{DMSO-}d_6$  at 125 MHz

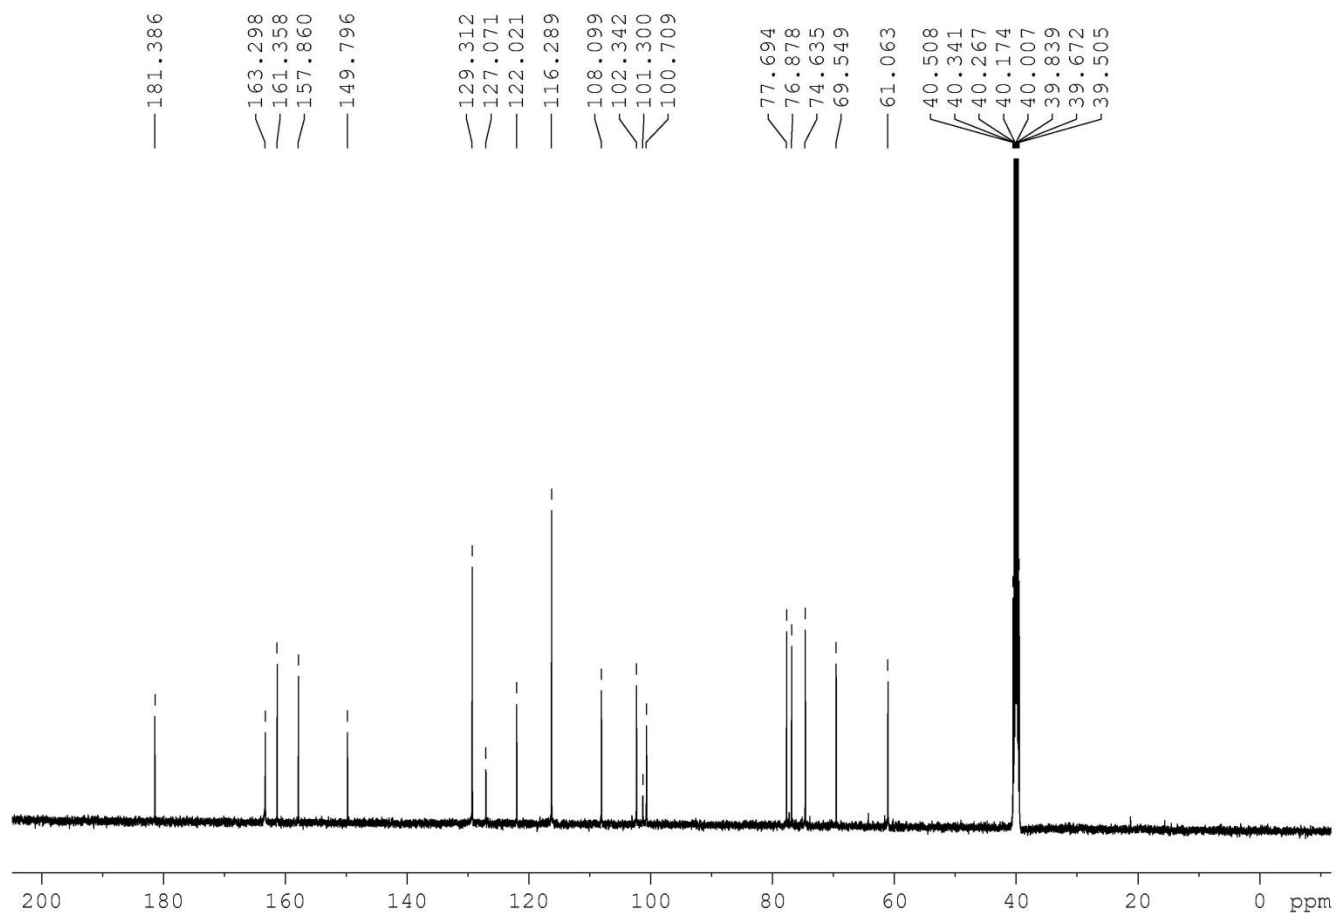

**Figure S3.** HMBC spectrum of compound IG in DMSO-*d*<sub>6</sub>

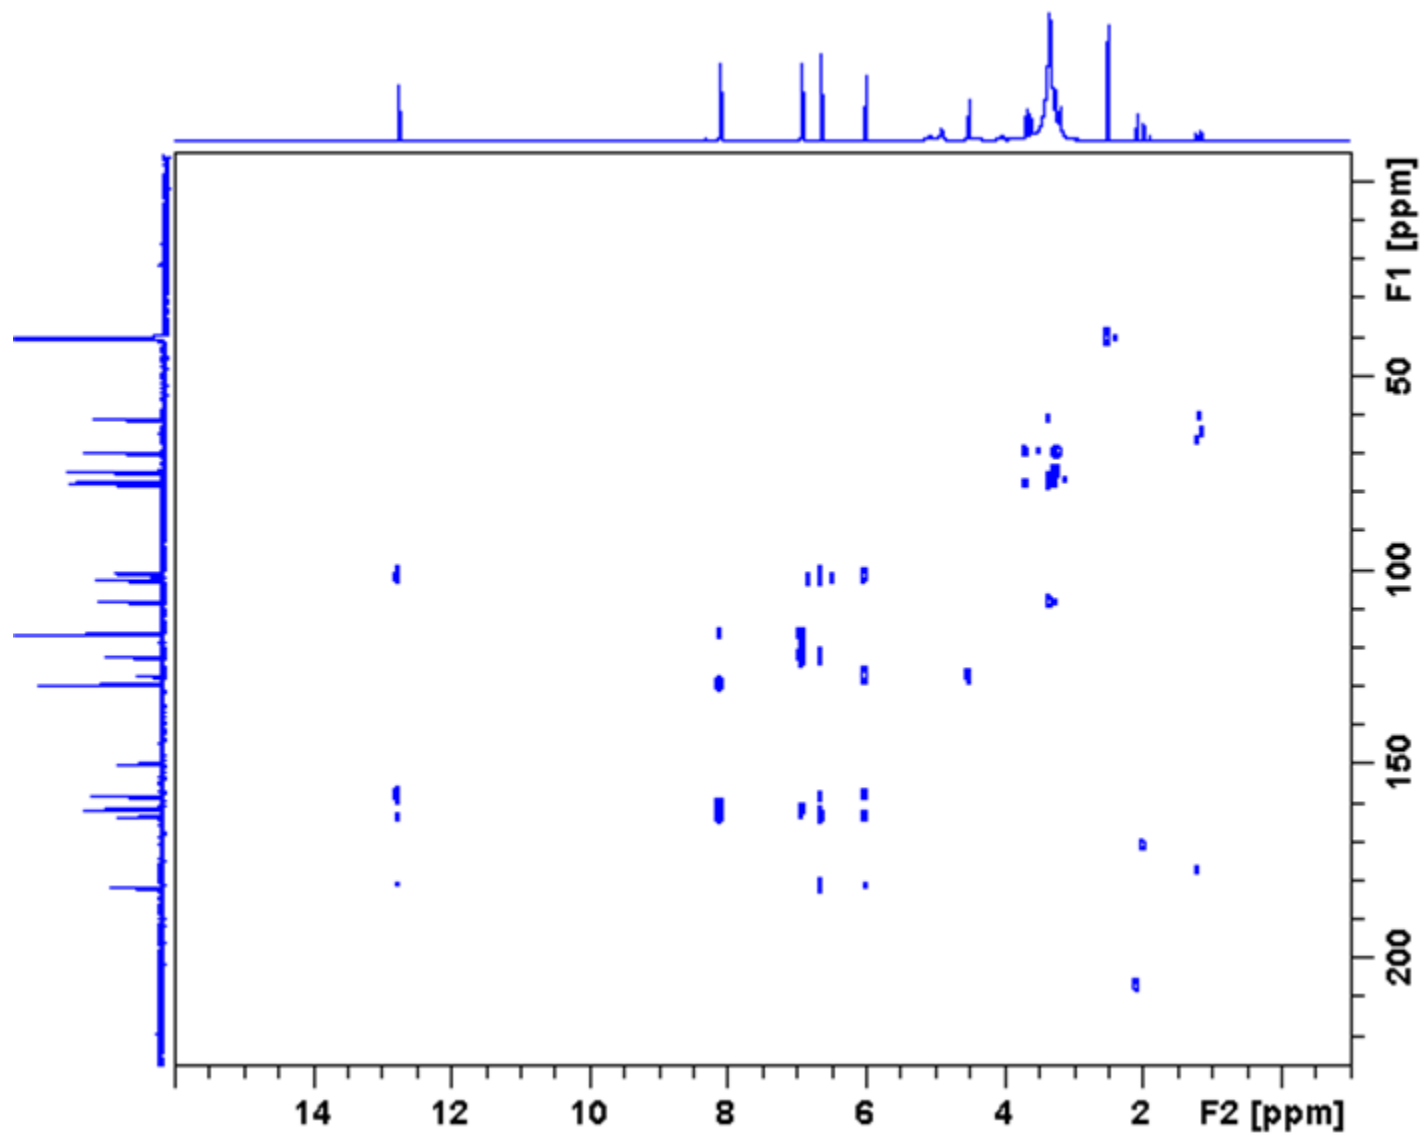

Figure S4. HSQC spectrum of compound IG in DMSO-*d*<sub>6</sub>

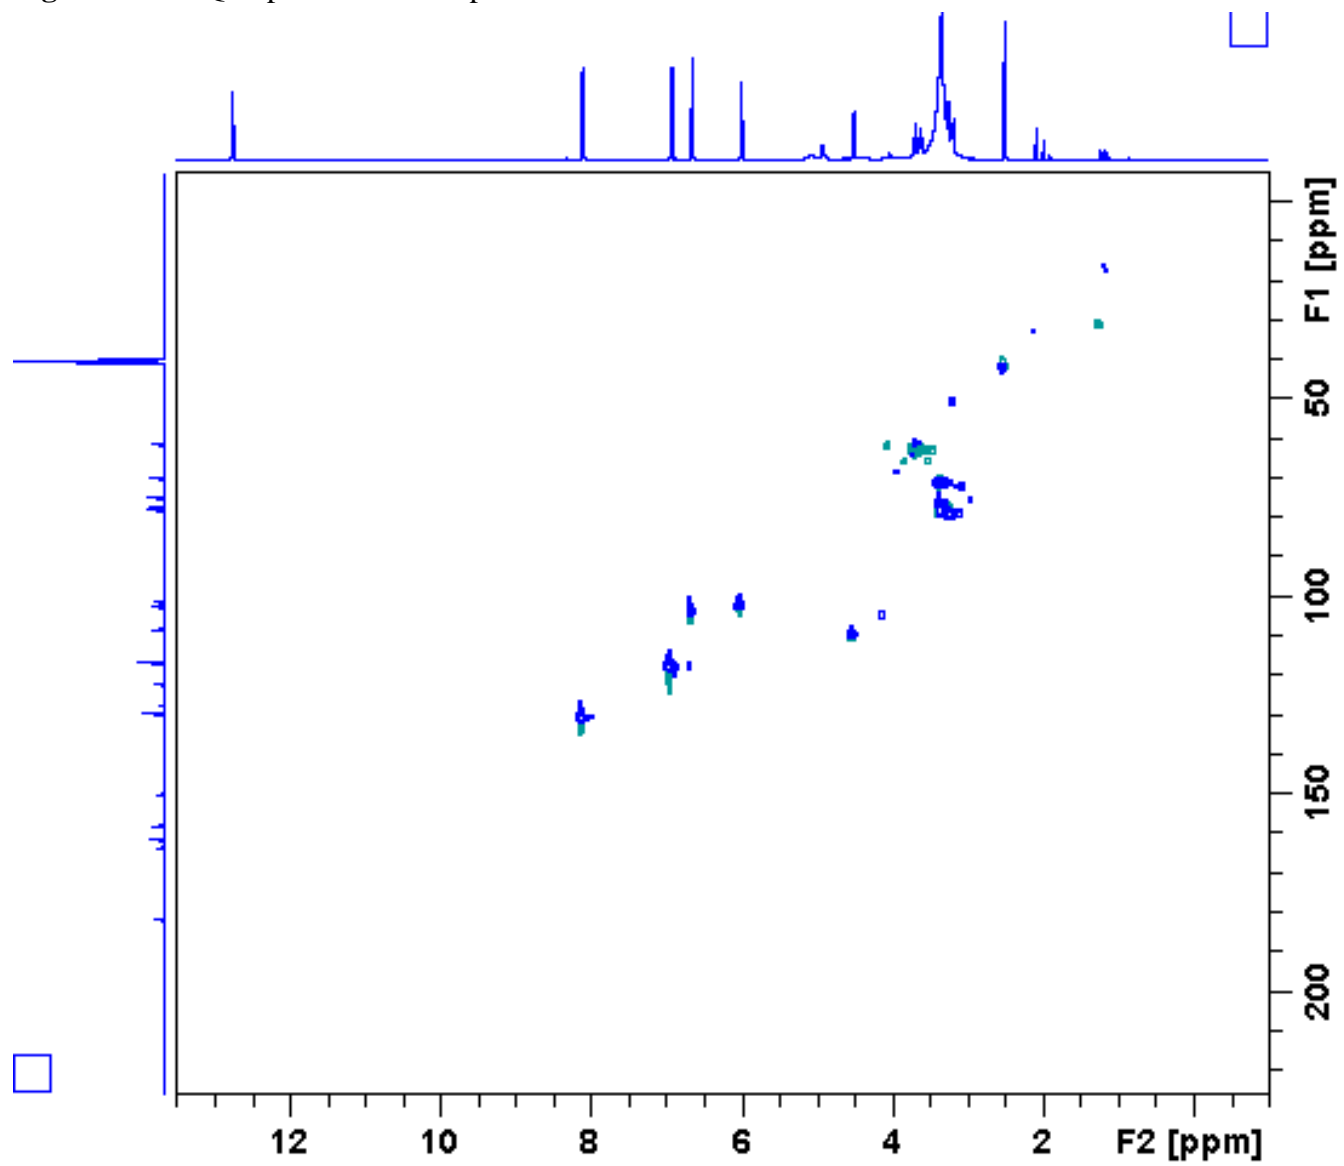

**Figure S5.** HR-ESI-MS spectrum of compound IG

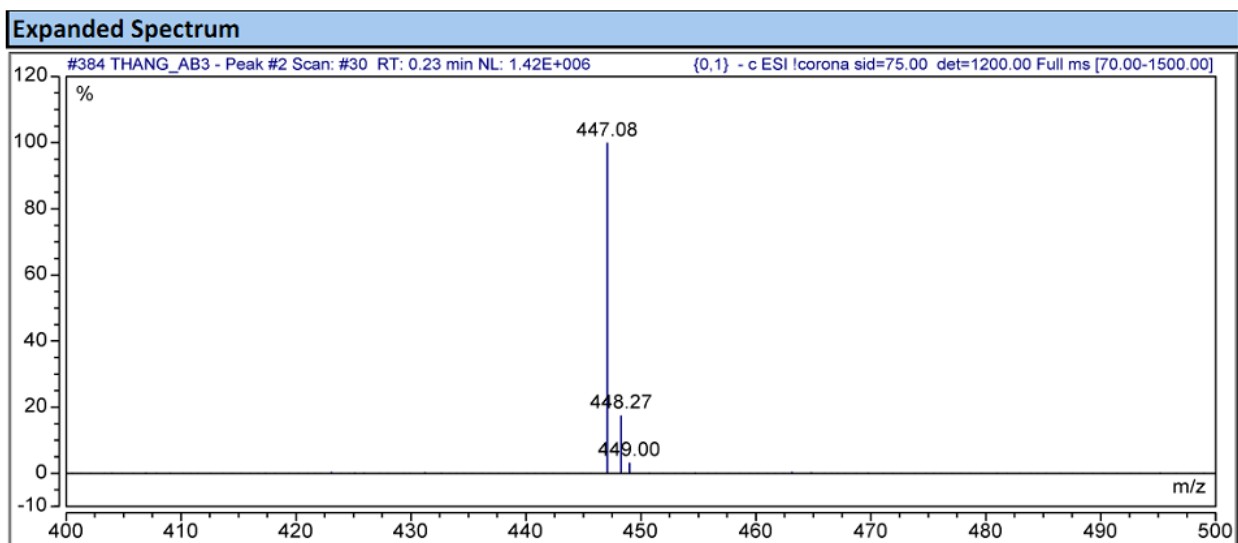

Supplement: biomolecules-10-00201-s001.pdf [file biomolecules-10-00201-s001.pdf]
